# Supplementary material
Source: PubMed Central journal article supplement (PMC5556948)
Supplement: NIHMS890337-supplement.pdf [file NIHMS890337-supplement.pdf]

**Supplementary Table 1: GelMA/Collagen Formulations**

| <b>G'</b><br>(kPa) | <b>Final Collagen</b><br>(mg/mL) | <b>GelMA</b><br>(20% w/v)              | <b>Gelatin</b><br>(10 mg/mL)<br>( $\mu$ L) | <b>Collagen</b><br>(10 mg/mL)<br>( $\mu$ L) | <b>10X PBS</b><br>( $\mu$ L) | <b>NaOH</b><br>(0.1 M)<br>( $\mu$ L) | <b>LAP</b><br>(1%)<br>( $\mu$ L) | <b>PBS</b><br>( $\mu$ L) | <b>Swelling Ratio</b> |
|--------------------|----------------------------------|----------------------------------------|--------------------------------------------|---------------------------------------------|------------------------------|--------------------------------------|----------------------------------|--------------------------|-----------------------|
| <b>2</b>           | <b>0</b>                         | 120 $\mu$ L 2.5M<br>240 $\mu$ L 0.25M  | 432                                        | -                                           | -                            | -                                    | 50                               | 158                      | 20.57<br>$\pm$ 1.79   |
|                    | <b>1.5</b>                       | 375 $\mu$ L 0.25M                      | 225                                        | 225                                         | 28                           | 28                                   | 50                               | 69                       | 20.55<br>$\pm$ 1.79   |
|                    | <b>3</b>                         | 375 $\mu$ L 0.25M                      | -                                          | 450                                         | 56                           | 56                                   | 50                               | 13                       | 18.79<br>$\pm$ 1.73   |
| <b>7</b>           | <b>0</b>                         | 140 $\mu$ L 2.5M<br>210 $\mu$ L 0.25M  | 420                                        | -                                           | -                            | -                                    | 50                               | 180                      | 19.72<br>$\pm$ 1.63   |
|                    | <b>1.5</b>                       | 88.8 $\mu$ L 2.5M<br>266 $\mu$ L 0.25M | 213                                        | 213                                         | 26.5                         | 26.5                                 | 50                               | 116                      | 18.76<br>$\pm$ 1.86   |
|                    | <b>3</b>                         | 88.8 $\mu$ L 2.5M<br>266 $\mu$ L 0.25M | -                                          | 426                                         | 53                           | 53                                   | 50                               | 63                       | 17.86<br>$\pm$ 2.17   |
| <b>12</b>          | <b>0</b>                         | 275 $\mu$ L 2.5M                       | 330                                        | -                                           | -                            | -                                    | 50                               | 345                      | 20.18<br>$\pm$ 2.09   |
|                    | <b>1.5</b>                       | 305 $\mu$ L 7M                         | 183                                        | 183                                         | 23                           | 23                                   | 50                               | 233                      | 19.81<br>$\pm$ 2.32   |
|                    | <b>3</b>                         | 305 $\mu$ L 7M                         | -                                          | 366                                         | 46                           | 46                                   | 50                               | 187                      | 18.09<br>$\pm$ 1.22   |

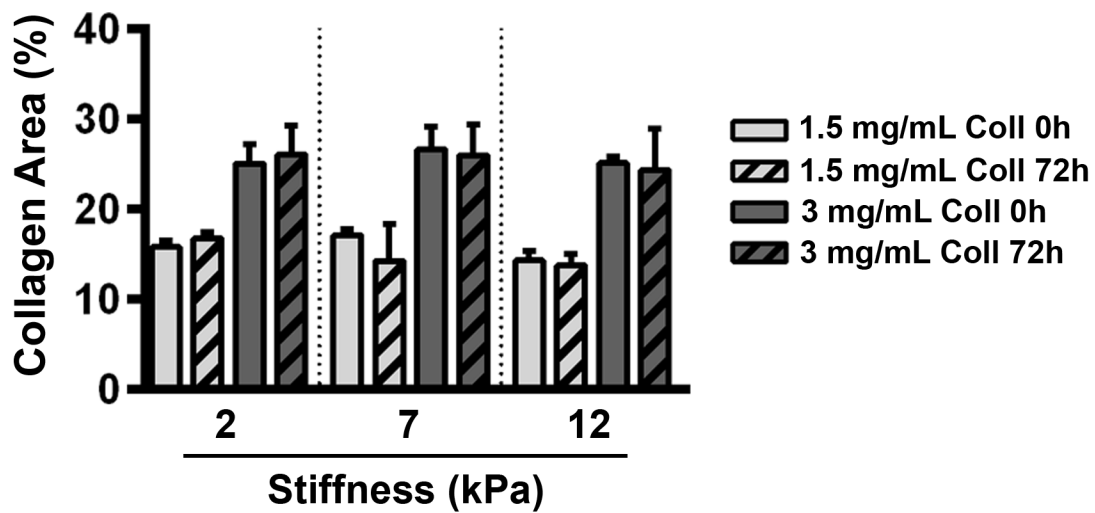

**Supplemental Figure 1:** The collagen network in gelMA/coll hydrogels is stable and remains intact under experimental conditions. Incubation in DMEM medium at 37°C and 5% CO<sub>2</sub> for 72 hours did not change the percent area of CNA35-EGFP labelled collagen in any gelMA/coll formulation imaged ( $p > 0.05$ ).

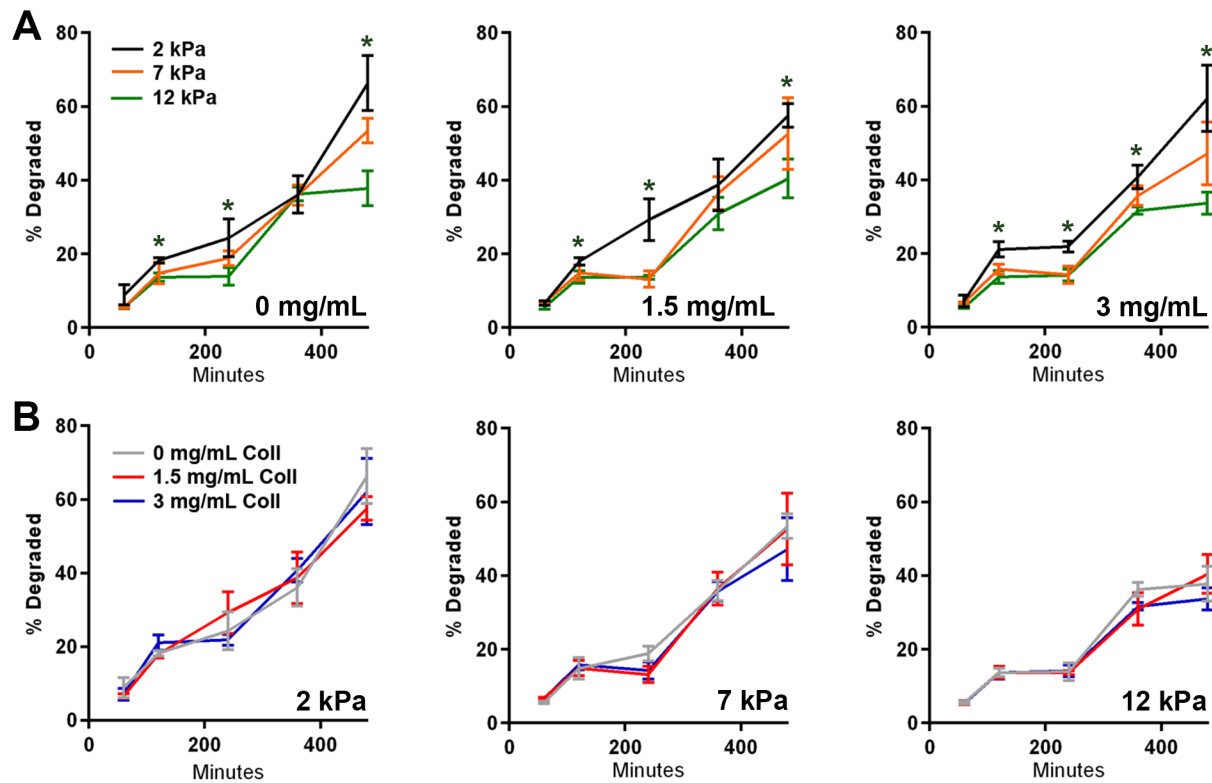

**Supplemental Figure 2:** Hydrogel degradation is affected by gelMA acrylation but not the addition of collagen. (A) Degradation of gelMA/coll hydrogels upon treatment with exogenous collagenase was more rapid in scaffolds with lower degrees of gelMA acrylation. \* indicates significance ( $p < 0.05$ ) between 2 kPa and 12 kPa conditions. (B) The addition of collagen at each stiffness had no effect on the rate of degradation within a given stiffness.  $n=3$ , data are mean with standard deviation.

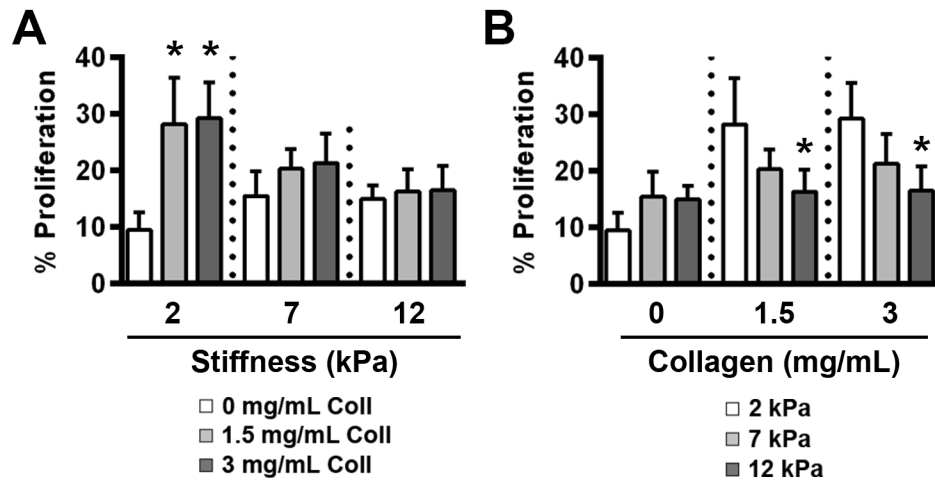

**Supplemental Figure 3:** MDA-MB-231 proliferation increases with the addition of fibrous collagen. (A) The addition of collagen significantly increases proliferation in 2 kPa gelMA/coll gels. \* indicates  $p < 0.05$  when compared to 0 mg/mL coll at same stiffness,  $n=8$ , data are mean with standard deviation. (B) As stiffness increases for a given fiber density, proliferation decreases. \* indicates  $p < 0.05$  when compared to 2 kPa of same collagen concentration,  $n=8$ , data are mean with standard deviation.
